# Supplementary material for: Outstanding chain-extension effect and high UV resistance of polybutylene succinate containing amino-acid-modified layered double hydroxides
Source: publisher site journal article supplement (doi:10.3762/bjnano.10.68), 2019-03-12
Supplement: Additional file 1 [file 2190-4286-10-68-S1.pdf]

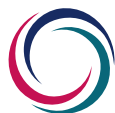

## Supporting Information

for

### **Outstanding chain-extension effect and high UV resistance of polybutylene succinate containing amino-acid-modified layered double hydroxides**

Adam A. Marek, Vincent Verney, Christine Taviot-Gueho, Grazia Totaro, Laura Sisti, Annamaria Celli and Fabrice Leroux

*Beilstein J. Nanotechnol.* **2019**, *10*, 684–695. doi:10.3762/bjnano.10.68

### **Additional experimental data and experimental schemes**

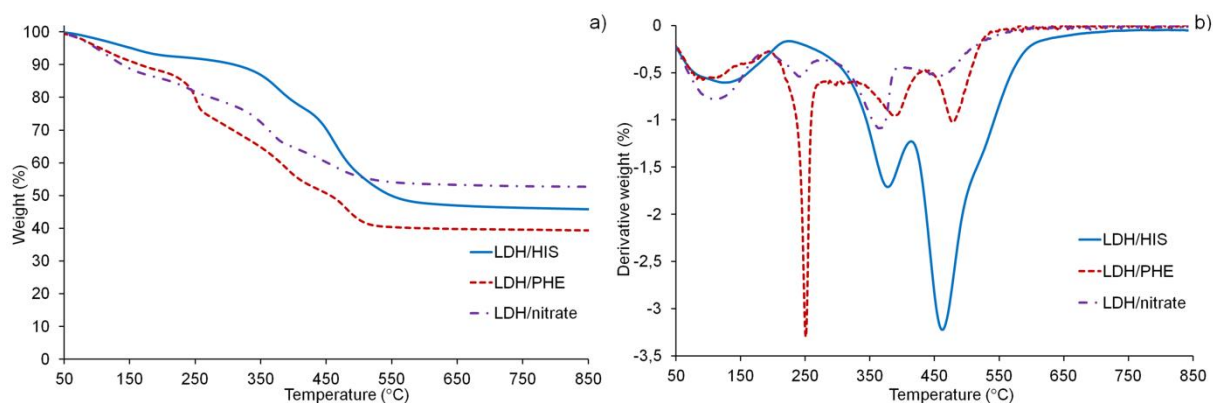

**Figure S1:** TGA (a) and DTGA (b) traces of Mg<sub>2</sub>Al LDHs, under air flow

### The procedure for calculation of experimental chemical compositions on example of LDH/HIS

The general formula of synthesized LDH with molecular weight  $M_{RT}$  is:

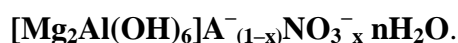

XRD analysis excludes the presence of carbonates but confirms nitrate anions in interlayers space.

|       |                                                                     |                                              |
|-------|---------------------------------------------------------------------|----------------------------------------------|
| Data: | Anion HIS <sup>-</sup>                                              | $M_w = 154.15 \text{ g}\cdot\text{mol}^{-1}$ |
|       | Anion NO <sub>3</sub> <sup>-</sup>                                  | $M_w = 62.00 \text{ g}\cdot\text{mol}^{-1}$  |
|       | Mg <sub>2</sub> AlOH <sub>6</sub>                                   | $M_w = 177.64 \text{ g}\cdot\text{mol}^{-1}$ |
|       | Mg <sub>2</sub> AlO <sub>7/2</sub>                                  | $M_w = 131.58 \text{ g}\cdot\text{mol}^{-1}$ |
|       | Mass of the residue at 800 °C (Mg <sub>2</sub> AlO <sub>7/2</sub> ) | = 55 wt %                                    |

The calculation is based on TGA traces.

$$M_{RT}(\text{LDH}/\text{HIS}) = 131.58/(1-0.55) = 292.4 \text{ g mol}^{-1}$$

The water molecule content “n” is calculated from the mass loss after the first relative minimum on the derivative curve  $\approx 170^\circ\text{C}$ . In the case of LDH/HIS The mass loss of H<sub>2</sub>O is 7 wt %.

$$\text{Mass H}_2\text{O} = M_{RT} \cdot \% \text{H}_2\text{O} = 292.4 \cdot 0.07 = 20.47 \text{ g} \gg n \text{ H}_2\text{O} = 20.47/18.02 = 1.14 \text{ mol}$$

Next, the amount of HIS and nitrate anions are calculated:

$$154.15 \cdot (1-x) + 62 \cdot x = 292.4 - 177.64 - 1.14 \cdot 18.02 \quad \gg \quad x = 0.65$$

The chemical composition for LDH/HIS is  $[\text{Mg}_2\text{Al}(\text{OH})_6](\text{HIS}^-)_{0.35}(\text{NO}_3^-)_{0.65} \cdot 1.14\text{H}_2\text{O}$ .

Similar calculations have been done for LDH/PHE, where:

$$M_{\text{RT}}(\text{LDH/PHE}) = 131.58 / (1 - 0.62) = 346.26 \text{ g mol}^{-1}$$

$$\text{and } \text{H}_2\text{O} = 11.5 \text{ wt } \% \gg n \text{ H}_2\text{O} = 2.21 \text{ mol}$$

In the case of LDH/nitrate:  $M_{\text{RT}}(\text{LDH/nitrate}) = 131.58 / (1 - 0.48) = 253.04 \text{ g mol}^{-1}$   
because only nitrate anions are present in the interlayered space (FTIR, XRD analysis), in this case,  $\text{H}_2\text{O}$  was calculated from the difference:

$$\text{Mass of } \text{H}_2\text{O} = M_{\text{RT}}(\text{LDH/nitrate}) - \text{Mg}_2\text{Al}(\text{OH})_6 - \text{NO}_3^- = 253.04 - 177.58 - 62 = 13.46 \text{ g}$$

$$\gg \gg n \text{ H}_2\text{O} = 13.46 / 18.02 = 0.75 \text{ mol}$$

It means that at 200 °C there is not only loss of water but also deshydroxylation.

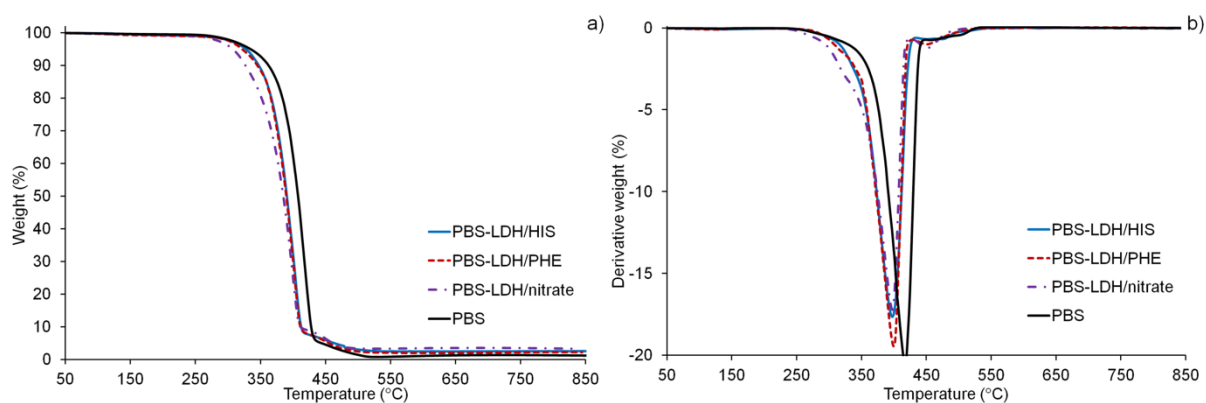

**Figure S2:** TGA (a) and DTGA (b) traces of PBS and PBS nanocomposites with  $\text{Mg}_2\text{Al}$  LDH fillers, under air flow.

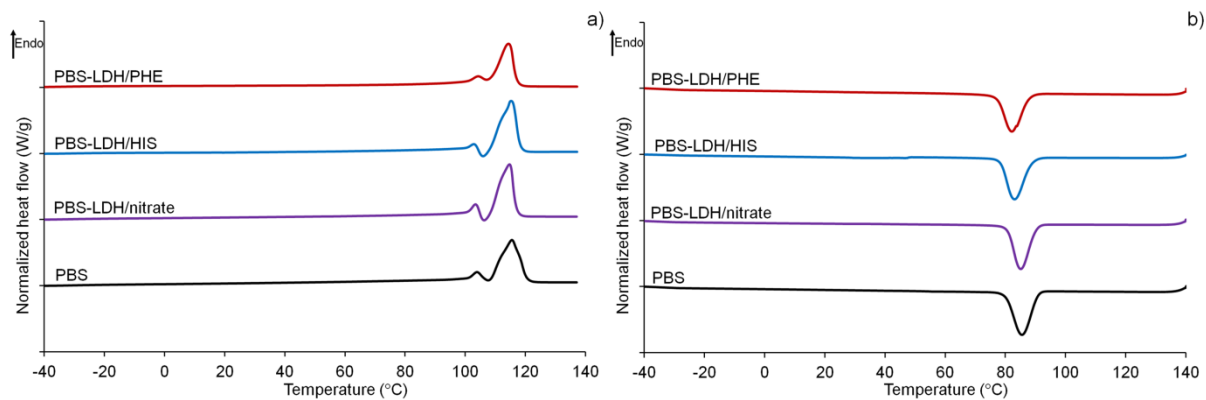

**Figure S3:** DSC traces of PBS and PBS nanocomposites with  $Mg_2Al$  LDH fillers: (a) heating scans and (b) cooling scans.

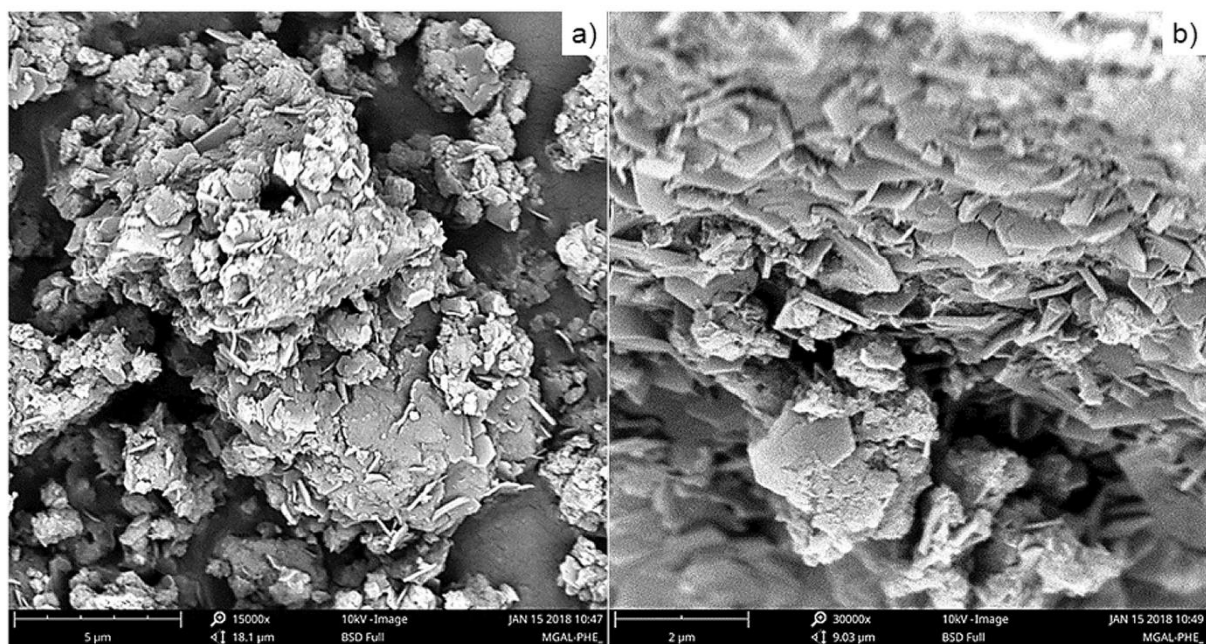

**Figure S4:** SEM micrographs of  $Mg_2Al$  LDH with phenylalanine: (a) zoom 15000x, (b) zoom 30000x.

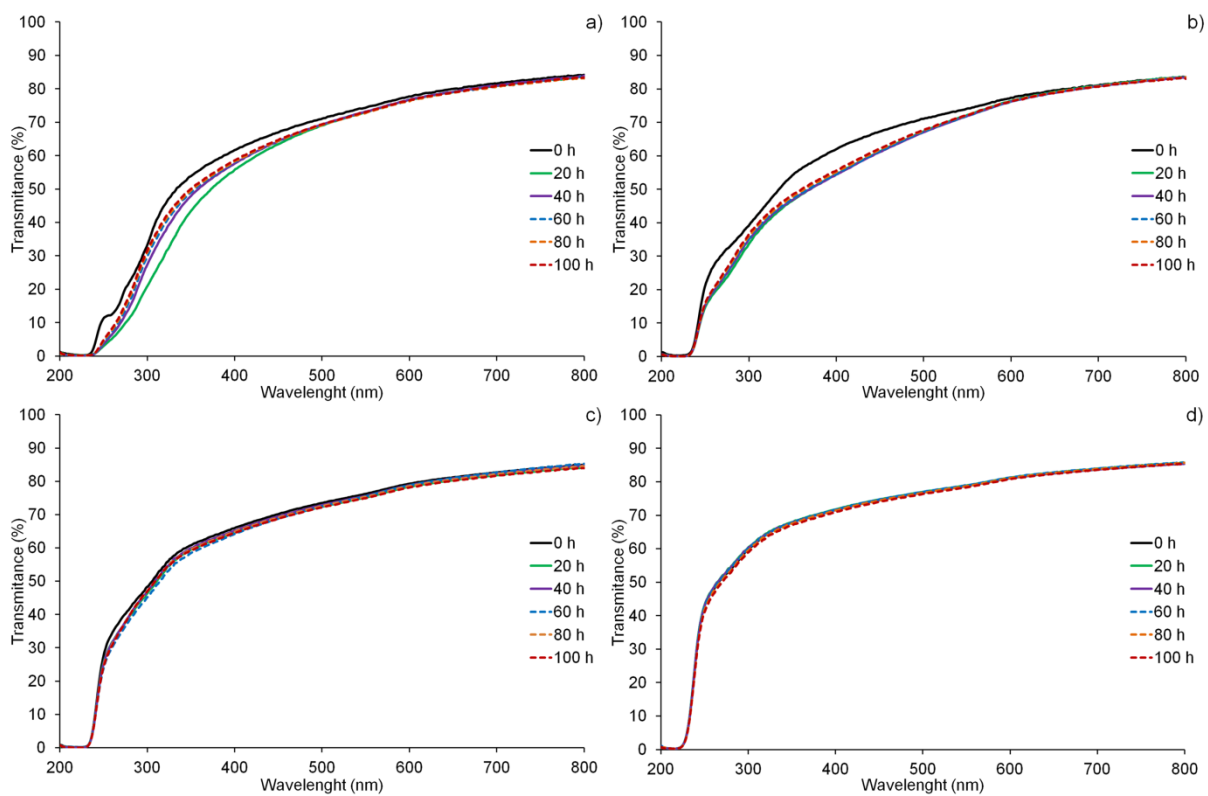

**Figure S5:** UV-vis transmittance spectra of PBS and PBS nanocomposites with  $Mg_2Al$  LDH fillers, during photodegradation at 60 °C; (a) LDH/PHE, (b) LDH/HIS, (c) LDH/nitrate and (d) PBS.
